# Supplementary material for: Nitrogen/oxygen co-doped mesoporous carbon octahedrons for high-performance potassium-ion batteries
Source: Royal Society of Chemistry journal article supplement (doi:10.1039/c8ta12504j), 2019-01-01
Supplement: c8ta12504j1.pdf [file c8ta12504j1.pdf]

## Nitrogen/Oxygen co-doped mesoporous carbon octahedrons for high-performance potassium-ion battery

Guoliang Xia<sup>1,†</sup>, Changlai Wang<sup>1,†</sup>, Peng Jiang<sup>1</sup>, Jian Lu<sup>1</sup>, Jiefeng Diao<sup>1</sup>, Qianwang Chen<sup>1,2</sup>

<sup>1</sup> Hefei National Laboratory for Physical Science at Microscale, Department of Materials Science & Engineering & Collaborative Innovation Center of Suzhou Nano Science and Technology, University of Science and Technology of China, Hefei 230026, China.

<sup>2</sup> High Magnetic Field Laboratory, Hefei Institutes of Physical Science, Chinese Academy of Sciences, Hefei 230031, China. † These authors contributed equally to this work. Correspondence and requests for materials should be addressed to Q.C. (email: cqw@ustc.edu.cn).

### Materials and methods

#### 1. Materials Synthesis

*Synthesis of the metal-organic frameworks (Cu-BTC):* All chemicals are analytical grade, and were used without any further purification. The Cu-BTC precursor was synthesized according the previous research. The typical experiment was carried out as follows. 1.82 g copper nitrate ( $\text{Cu}(\text{NO}_3)_2 \cdot 3\text{H}_2\text{O}$ ) and 0.875 g benzene-1,3,5-tricarboxylic acid ( $\text{C}_6\text{H}_3(\text{COOH})_3$ ) were dissolved in 50 ml absolute methanol under ultrasonication, respectively. After that, the solution was mixed under agitated string for a while and kept at room temperature for 12h. the precipitation was retrieved by centrifugation and washed with methanol several times. Finally, the blue powder of Cu-BTC was dried in a vacuum at 60 °C.

*The synthesis of the nitrogen/oxygen co-doped mesoporous carbon octhedrons (MCOs):* the precursor was annealed under N<sub>2</sub> atmosphere at 600 °C for 2 h to prepare Cu/C composites. Then the composites were treated with 10 wt% nitric acid at 60 °C for 24 hours to obtain nitrogen doped carbon materials for activation. As for the activation, 500 mg powder after HNO<sub>3</sub>

treating was dispersed in 50 ml 3M aqueous KOH solution and stirred for 6 hours. The extra KOH solution was removed by centrifugation, and then the mixture was dried at 60 °C for 24 hours. The dry mixture was heated at 800 °C for 2 hours under N<sub>2</sub> atmosphere. After cooling down to room temperature, the sample was repeatedly washed by deionized water until a pH value of 7 was reached. Finally, the sample was dried at 60 °C for 24 hours to get MCOs.

## **2. Characterization**

The power X-ray diffraction (XRD) patterns of all samples were recorded with an X-ray diffractometer (Japan Rigaku D/MAX- $\gamma$ A) equipped with Cu-K $\alpha$  radiation ( $\lambda = 1.54178 \text{ \AA}$ ) over the  $2\theta$  range of 20-80°. Field emission scanning electron microscopy (FE-SEM) images were collected on a JEOL JSM-6700 M scanning electron microscope. Transmission electron microscope (TEM) images were taken on Hitachi H-800 transmission electron microscope using an accelerating voltage of 200 kV, and high-resolution transmission electron microscope (HRTEM) (jeol-2011) was operated at an acceleration voltage of 200 kV. The specific surface area was evaluated at 77 K (Micromeritics ASAP 2020) using the Brunauer-Emmett-Teller (BET) method, while the pore volume and pore size were calculated according to the Barrett-Joyner-Halenda (BJH) formula applied to the adsorption branch. Thermogravimetric analysis (TGA) was carried out using a Shimadzu-50 thermoanalyser under nitrogen flow. XPS measurements were performed on a VGESCALAB MK II X-ray photoelectron spectrometer with an MgK $\alpha$  excitation source (1253.6 eV).

## **3. Electrochemical Measurement**

The electrochemical behavior of the MCOs were performed using CR2032 coin-type cells with potassium serving as the counter electrode and the reference electrode. To prepare a working

electrode, the as-synthesized active material (MCOs, 80 wt%), conductive material (acetylene black, 10 wt%), and the polymer binder (PVDF, 10 wt%) were mixed in N-methyl-2-pyrrolidone. The mixture was subsequently brush coated on copper foil and then dried at 80 °C for 12 h. The electrolyte used in the cells was 1.00 M  $\text{KPF}_6$  in ethylene carbonate and diethyl carbonate (EC/DEC = 1:1). The cells were assembled in an argon-filled glove box with both the moisture and the oxygen content below 1 ppm (Mikrouna, Super (1220/750/900)). Cyclic voltammograms (CV) were obtained on a CHI760E electrochemical workstation. The electrode capacity was measured using the galvanostatic discharge/charge method and employing a battery test system (Neware CT-3008W) with a voltage range between 0.01 and 3.0 V.

#### **4. Computational Methods**

All the calculations were based on density functional theory with spin unrestricted by using the Vienna ab-initio simulation package (VASP)<sup>[1]</sup>. The generalized gradient approximation (GGA) with the function of Perdew-Becke-Ernzerhof (PBE) was employed to describe the electron interaction energy of exchange correlation<sup>[2,3]</sup>. The projector augmented wave was applied to describe the electron-ion interaction and the plane-wave energy cutoff was set to 400 eV. All structures were optimized with a convergence criterion of  $1 \times 10^{-5}$  eV for the energy and 0.01 eV/Å for the forces. Brillouin zone sampling was employed using a Monkhorst-Packing grid with  $3 \times 3 \times 1$ . And  $5 \times 5 \times 1$  K-point grid was used to calculate the density of states (DOS). The insertion energy is defined as the following Equation:

$$\Delta E = [E_2 - (E_1 + \mu_K)]$$

where  $E_1$  and  $E_2$  are the total energies of the system before and after introducing potassium atoms, respectively, and  $\mu_K$  is the chemical potential of potassium bulk. A

positive  $\Delta E$  indicates an endothermic and unstable K insertion reaction while a negative  $\Delta E$  suggests an exothermic and stable reaction.

Table S1. The insertion energy of different structure.

| Structure           | pure O doped carbon | pure N doped carbon | N and O co-doped carbon |
|---------------------|---------------------|---------------------|-------------------------|
| Insertion energy/eV | -1.28               | -1.86               | -1.90                   |

#### References

- [1] G. Kresse, J. Hafner, *Phys. Rev. B* **1993**, *48*, 13115.
- [2] J. P. Perdew, K. Burke, M. Ernzerhof, *Phys. Rev. Lett.* **1996**, *77*, 3865.
- [3] J. P. Perdew, M. Ernzerhof, K. Burke, *J. Chem. Phys.* **1996**, *105*, 9982.

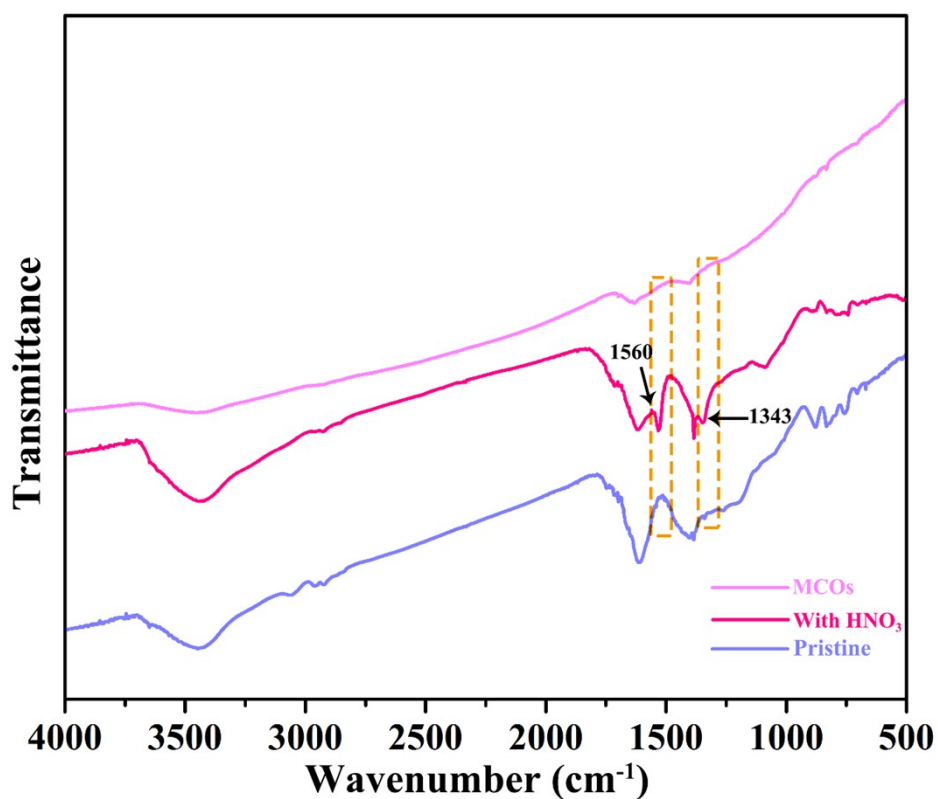

**Figure S1.** FT-IR spectrum of the pristine Cu/C composites (after carbonization), after HNO<sub>3</sub> washing and MCOs

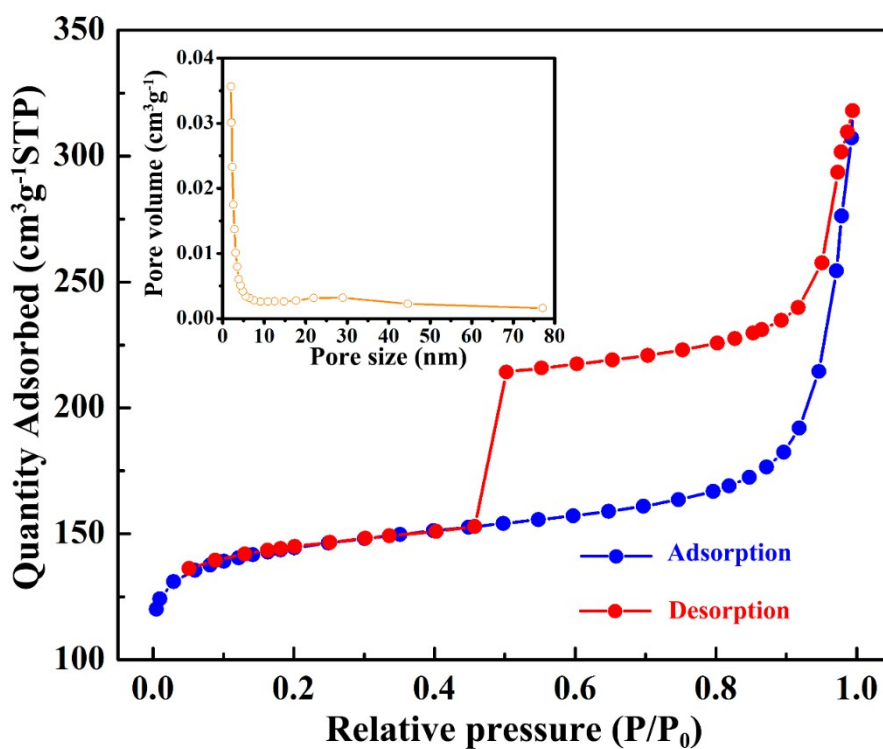

**Figure S2.** Nitrogen adsorption-desorption isotherm (inset: pore size distribution) for MCOs without etching

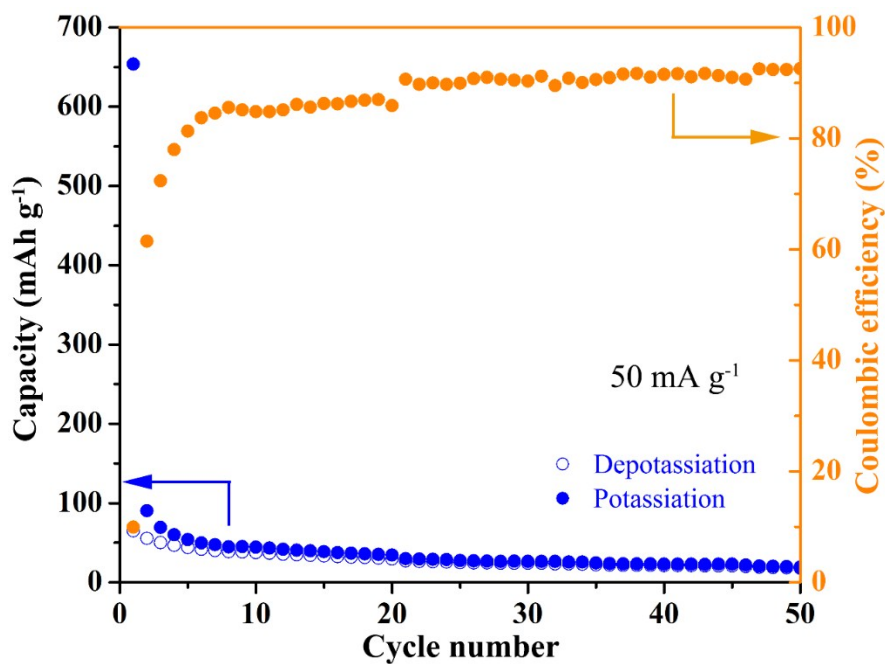

**Figure S3.** cycling performance of MCOs without etching at a current density of 50 mA g<sup>-1</sup>

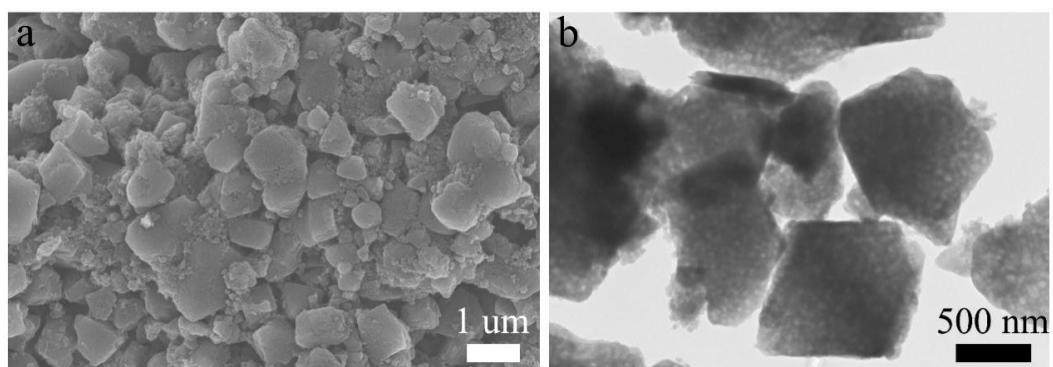

**Figure S4.** a) SEM and b) TEM images of MCO after 3000 cycles at  $2 \text{ A g}^{-1}$

**Table S2.** The comparison of K-storage performance between MCOs and other carbonaceous materials.

| Name        | Current density<br>( $\text{mA g}^{-1}$ ) | Charge capacity<br>( $\text{mA h g}^{-1}$ ) | Cycle<br>number | Reference        |
|-------------|-------------------------------------------|---------------------------------------------|-----------------|------------------|
| Hard carbon | 28                                        | 216                                         | 100             | Ref 9            |
| PCMs        | 50                                        | 226.6                                       | 100             | Ref 12           |
| OMC         | 50                                        | 257.4                                       | 100             | Ref 13           |
| Nanofiber   | 25                                        | 248                                         | 100             | Ref 14           |
| graphite    | 200                                       | 100                                         | 100             | Ref 26           |
| Soft carbon | 100                                       | 249                                         | 100             | Ref 27           |
| Graphene    | 100                                       | 210                                         | 100             | Ref 28           |
| NONPHC      | 50                                        | 230.6                                       | 100             | Ref 29           |
| MCOs        | 50/100                                    | 364/240                                     | 50/100          | <b>This work</b> |
|             | 1000/2000                                 | 100/80                                      | 1300/3000       | <b>This work</b> |
